# Supplementary material for: Effect of heteroatoms on the optical properties and enzymatic activity of N-doped carbon dots
Source: Royal Society of Chemistry journal article supplement (doi:10.1039/d1ra03175a), 2021-01-01
Supplement: d1ra03175a1.pdf [file d1ra03175a1.pdf]

Supporting information

# Effect of heteroatoms on optical properties and enzymatic activity of N-doped carbon dots

Ahyun Lee,<sup>†</sup> Sohee Yun,<sup>†</sup> Eun Soo Kang, Jung Wan Kim, Jeong Ho Park, Jin-sil Choi\*

Hanbat National University, Dept. of Chemical and Biological Engineering,

125 Dongseodaero Yuseonggu, Daejeon 34158, Korea, Republic of

### Transmission electron microscopy (TEM) images of N-CDs

The morphology of non-doped CD and N-CDs were investigated by TEM (H-7650 Hitachi, Japan) installed in the Center for University-wide Research Facilities (CURF) at Jeonbuk National University. The average size of each nanoparticle was calculated by measuring the diameters of 200 particles in TEM images (Figure S2).

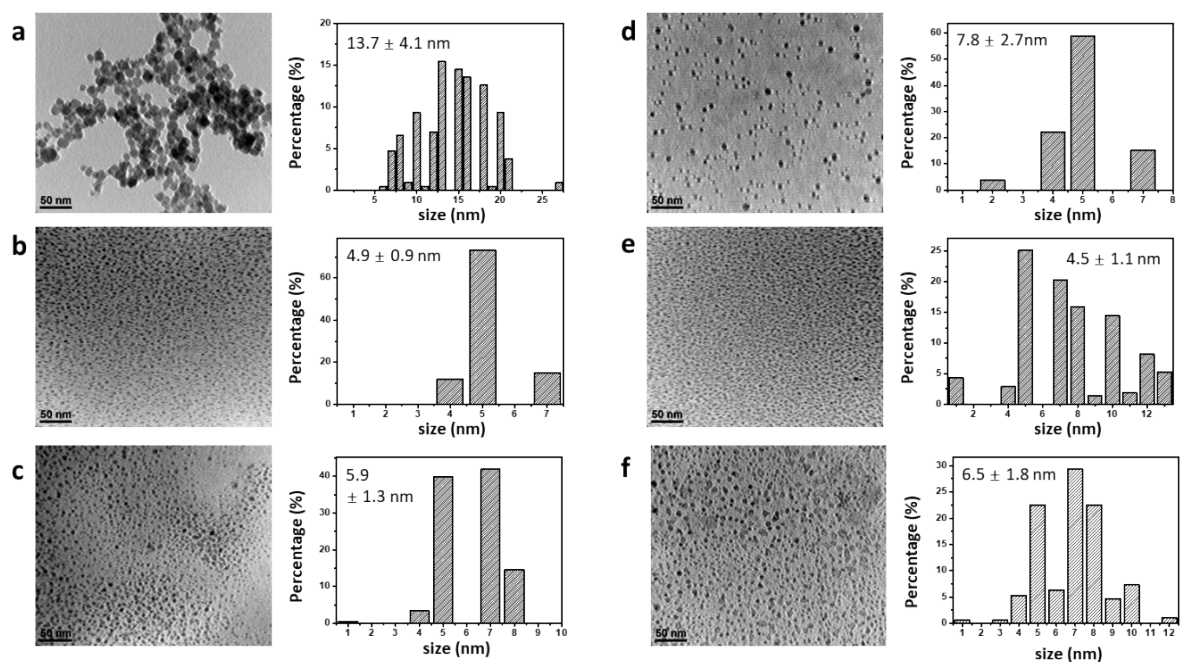

**Figure S1.** TEM images and particle size distribution histograms of non-doped CD and N-CDs; a) N-CD\_1, b) N-CD\_2, c) N-CD\_3, d) N-CD\_4, e) N-CD\_5, and f) non-doped CD.

***High resolution (HR)-TEM image of non-doped CD***

Non-doped CD possesses a crystalline structure with a lattice distance of 0.2 nm, which matches with the (100) plane of graphite.

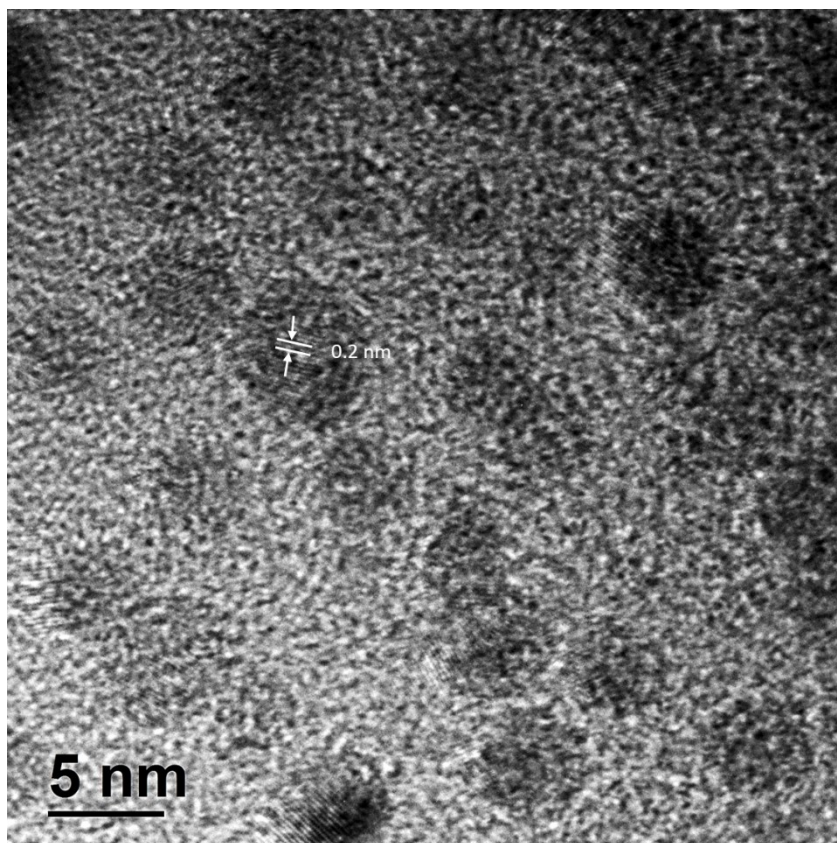

**Figure S2.** HR-TEM image of non-doped CD.

*Analysis of crystal structure of obtained N-CDs and non-doped CDs*

The X-ray diffraction (XRD) pattern was obtained using Miniflex Benchtop X-ray diffractometer (Rigaku). XRD spectrum of all N-CDs shows broad peaks, indicating their amorphous nature while that of non-doped CD reveals the crystalline character of non-doped CD. The incorporation of the N atom into the carbogenic domains leads to the amorphous nature of N-CDs.

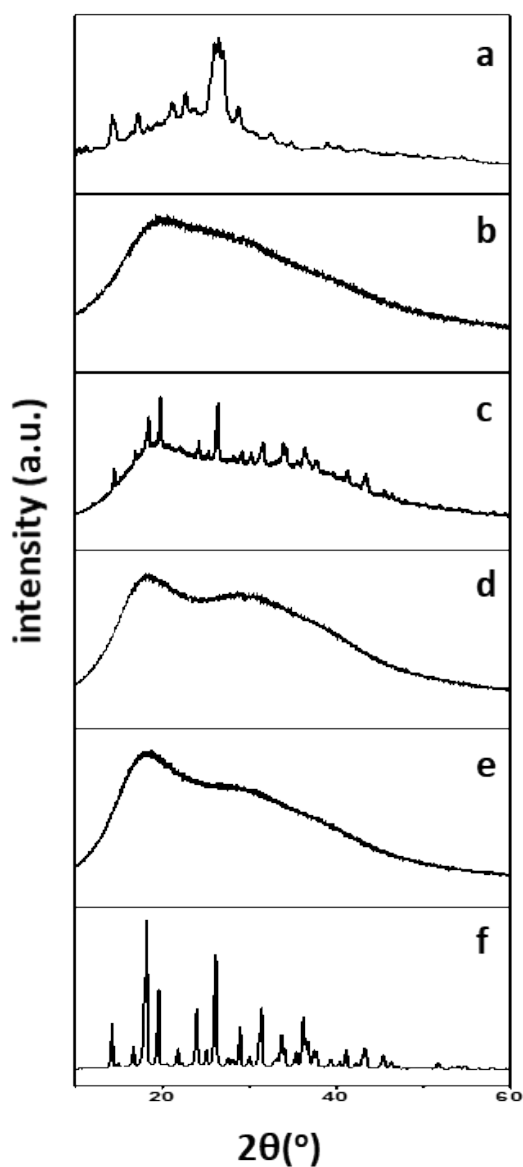

**Figure S3.** XRD patterns of non-doped CD and N-CDs; a) N-CD\_1, b) N-CD\_2, c) N-CD\_3, d) N-CD\_4, e) N-CD\_5, and f) non-doped CD.

### IR spectrum of as-synthesized N-CDs

The Fourier transform infrared (FT-IR) spectra were obtained using a Nicolet 6700 (Thermo, United States). In IR spectrum of as-synthesized N-CD, there are newly appeared peaks at  $1673\text{ cm}^{-1}$  and  $1549\sim 1410\text{ cm}^{-1}$  that represent C=C stretching in conjugated alkene and C-N stretching in aromatic amine, respectively.

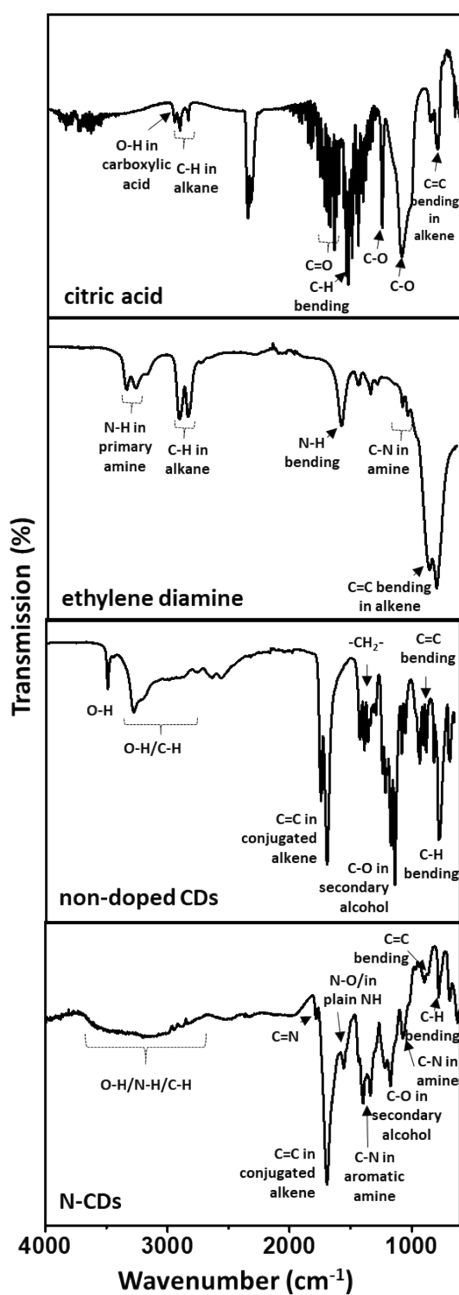

**Figure S4.** Comparison of IR spectrum between citric acid, ethylenediamine, non-doped CDs and as-synthesized N-CDs.

### *Surface charge of N-CDs*

The surface charge of N-CDs was measured using Zetasizer Nano ZS (Malvern Panalytical, United Kingdom). Overall surface charge of N-CDs was negative because of abundant carboxylic groups at the N-CD surface.

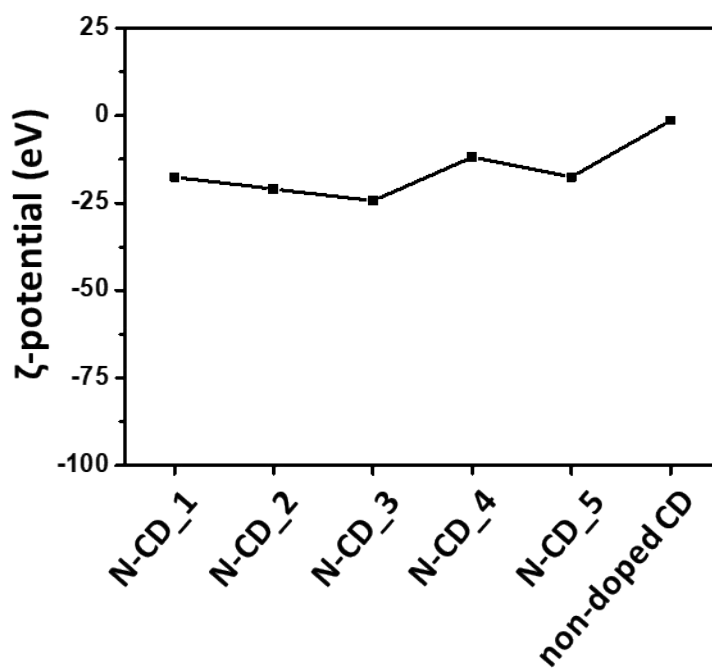

**Figure S5.** Zeta potential value of N-CDs

### Comparison of relative atomic composition based on XPS spectra

The chemical composition of N-CDs was investigated with X-ray photoelectron spectroscopy (XPS, K-Alpha+, ThermoFisher Scientific, USA). Relative contents of each atom were quantified by measuring the peak area in survey scan spectra are shown in Figure 2a.

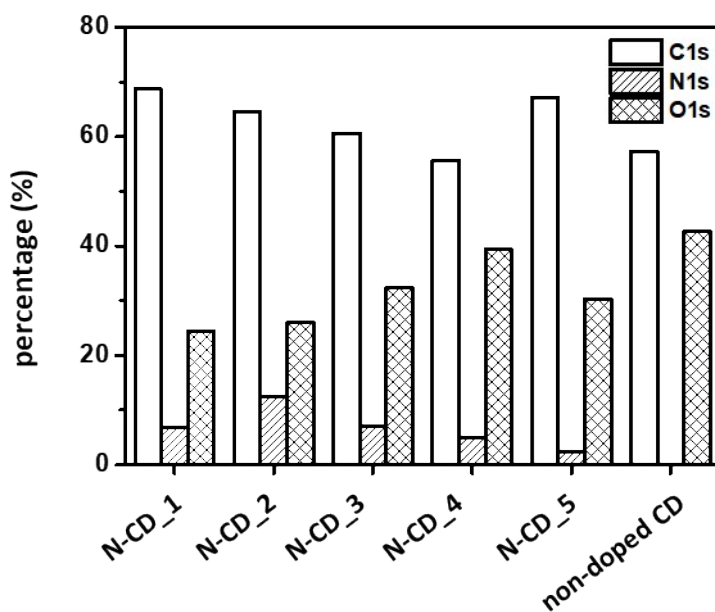

Figure S6. Ratio of each component in N-CDs based on XPS peak area.
