# Supplementary material for: Effect of heteroatoms on the optical properties and enzymatic activity of N-doped carbon dots
Source: Royal Society of Chemistry journal article supplement (doi:10.1039/d1ra03175a), 2021-01-01
Supplement: d1ra03175a2.pdf [file d1ra03175a2.pdf]

*Supplementary Materials for Review*

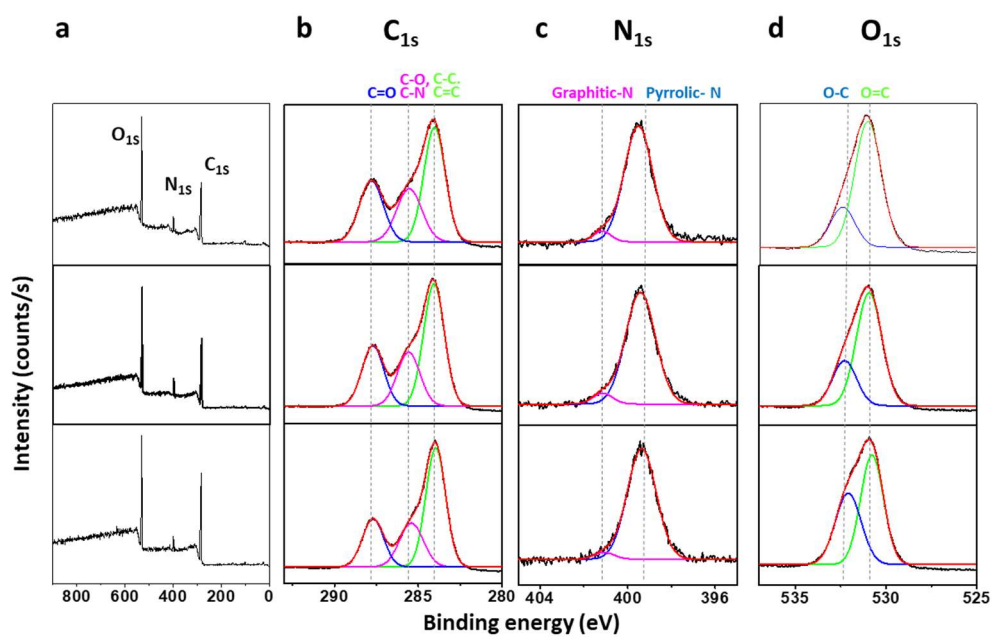

a) XPS survey scan profiles and high-resolution b) C1s, c) N1s, and d) O1s spectra of N-CD<sub>2</sub> from three different batches.
